# Supplementary material for: Novel and Conserved miRNAs Among Brazilian Pine and Other Gymnosperms
Source: PubMed Central journal article supplement (PMC6448024; doi:10.3389/fgene.2019.00222), 2019-03-22
Supplement: Data_Sheet_7.pdf [file Data_Sheet_7.pdf]

Data S7. **Expression patterns of conserved and novel *A. angustifolia* miRNAs in different tissues.** A) A three-month-old plant showing the tissues used for Stem-loop RT-qPCR assays. B) A schematic diagram of the expression patterns of 12 conserved miRNAs in five different tissues in *A. angustifolia*. C) A schematic diagram of the expression patterns of 30 novel miRNAs in five different tissues in *A. angustifolia*. The codes YF, OF, St, MR and SR indicate, respectively, young leaves, old leaves, stem, main root and secondary roots. The means of the samples were analyzed using one-way ANOVA followed by Duncan's multiple range tests. Different letters indicate statistical differences in expression patterns.

A

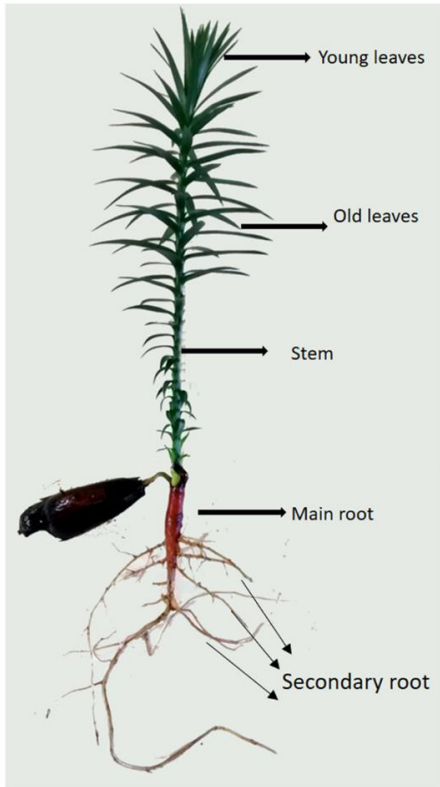

B

|         | YL | OL | St | MR | SR |
|---------|----|----|----|----|----|
| miR167  | c  | ab | a  | a  | bc |
| miR399  | a  | d  | ab | bc | cd |
| miR395  | c  | b  | d  | a  | a  |
| miR529  | a  | b  | b  | a  | a  |
| miR166  | a  | a  | b  | a  | a  |
| miR168  | a  | a  | b  | a  | a  |
| miR390  | a  | a  | b  | a  | b  |
| miR169  | ab | a  | a  | b  | ab |
| miR156  | a  | a  | a  | a  | b  |
| miR159  | a  | a  | a  | a  | b  |
| miR1314 | a  | ab | bc | ab | c  |
| miR171  | a  | a  | a  | a  | a  |

C

|         | YL | OL | St | MR | SR |
|---------|----|----|----|----|----|
| nmiR029 | b  | a  | a  | ab | a  |
| nmiR038 | d  | c  | b  | b  | a  |
| nmiR059 | b  | b  | b  | b  | a  |
| nmiR027 | b  | ab | a  | b  | b  |
| nmiR057 | ab | a  | b  | b  | b  |
| nmiR054 | a  | b  | b  | b  | a  |
| nmiR008 | a  | c  | ab | bc | a  |
| nmiR021 | a  | a  | b  | a  | a  |
| nmiR003 | a  | ab | c  | ab | b  |
| nmiR061 | a  | b  | c  | ab | ab |
| nmiR051 | a  | a  | a  | b  | a  |
| nmiR044 | bc | b  | a  | c  | b  |
| nmiR023 | a  | ab | ab | c  | bc |
| nmiR001 | a  | a  | a  | a  | b  |
| nmiR005 | a  | a  | a  | a  | b  |
| nmiR007 | a  | a  | a  | a  | b  |
| nmiR011 | a  | a  | a  | a  | b  |
| nmiR012 | a  | a  | a  | a  | b  |
| nmiR018 | a  | a  | a  | a  | b  |
| nmiR025 | a  | a  | a  | a  | b  |
| nmiR049 | a  | b  | ab | a  | c  |
| nmiR019 | a  | b  | ab | ab | c  |
| nmiR017 | a  | b  | b  | ab | c  |
| nmiR004 | a  | b  | b  | b  | c  |
| nmiR002 | a  | ab | ab | b  | c  |
| nmiR026 | a  | bc | b  | bc | c  |
| nmiR016 | a  | ab | bc | c  | d  |
| nmiR040 | a  | a  | a  | a  | a  |
| nmiR009 | a  | a  | a  | a  | a  |
| nmiR046 | a  | a  | a  | a  | a  |
